# Supplementary material
Source: publisher figshare collection journal article supplement (https://future-science-group.figshare.com/ndownloader/files/28250238)
Supplement: Supplementary file 1 [file 28250238]

Table 2: The main patent assignees in China. On the right-side not Chinese main co-assignees (co-assigned patents) (online only)

| **#** | **Assignee** | **# of Families** | **# of  Patents** | **I.I.** | **Headquarters (Country)** |
| --- | --- | --- | --- | --- | --- |
| 1 | **University Of Hong Kong** | **35** | **73** | 2,1 | Honk Hong |
| 2 | **Fudan University** | **15** | **27** | 1,8 | Shanghai |
| 3 | **BGI Shenzken Company** | **14** | **37** | 2,6 | Beijing |
| 4 | **Chinese Academy Of Sciences** | **14** | **26** | 1,9 | Beijing |
| 5 | **Sun Yat Sen University** | **14** | **17** | 1,2 | Guanzhou |
| 6 | **Chengdu Xinjin Shifeng Med.App.Instr.** | **9** | **9** | 1,0 | Chengdu |
| 7 | **CROWN Bioscence** | **8** | **20** | 2,5 | Taicang |
| 8 | **Peking University** | **7** | **7** | 1,0 | Beijing |
| 9 | **Xiamen University** | **6** | **17** | 2,8 | Xiamen |
| 10 | **Kunming Univ. of Science and Technology** | **5** | **9** | 1,8 | Kunming |

| **#** | **Co-Assignees** | **# of Families** | **# of  Patents** | **I.I:** | **Country** |
| --- | --- | --- | --- | --- | --- |
| 1 | **IBM** | **14** | **14** | 1 | USA |
| 2 | **Enanta Pharmaceuticals** | **13** | **27** | 2,1 | USA |
| 3 | **Bio Merieux** | **5** | **12** | 2,4 | France |
| 4 | **Academia Sinica** | **5** | **6** | 1,2 | Taiwan |
